# Supplementary material for: Fractographic mirror law for brittle fracture of nonlinear elastic soft materials
Source: Royal Society of Chemistry journal article supplement (doi:10.1039/d3sm00879g), 2023-01-01
Supplement: d3sm00879g1.pdf [file d3sm00879g1.pdf]

Supplementary Materials for  
**Fractographic Mirror Law for Brittle Fracture of Nonlinear Elastic Soft  
Materials**

Ryuji Kiyama<sup>a,b</sup>, Yong Zheng<sup>c</sup>, Takayuki Nonoyama<sup>a</sup>, Jian Ping Gong<sup>a,c\*</sup>

\*Corresponding author. Email: [gong@sci.hokudai.ac.jp](mailto:gong@sci.hokudai.ac.jp)

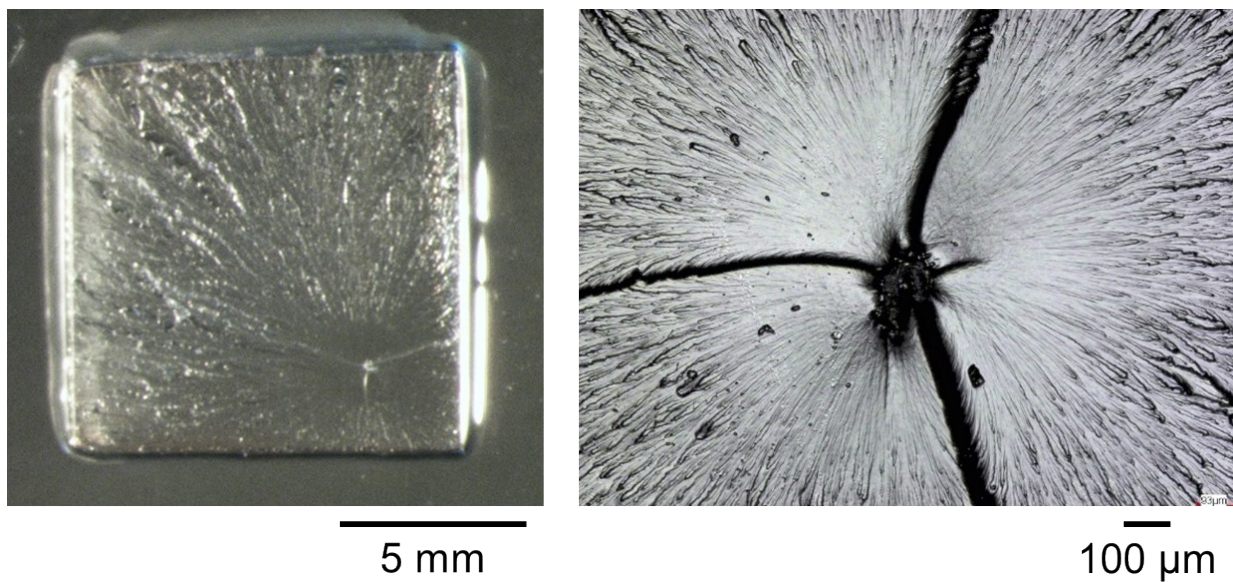

**Fig. S1.**

Example of the gel broken from internal defect (contaminant probably introduced during gel preparation). Left: overview. Right: high magnification image around the defect.

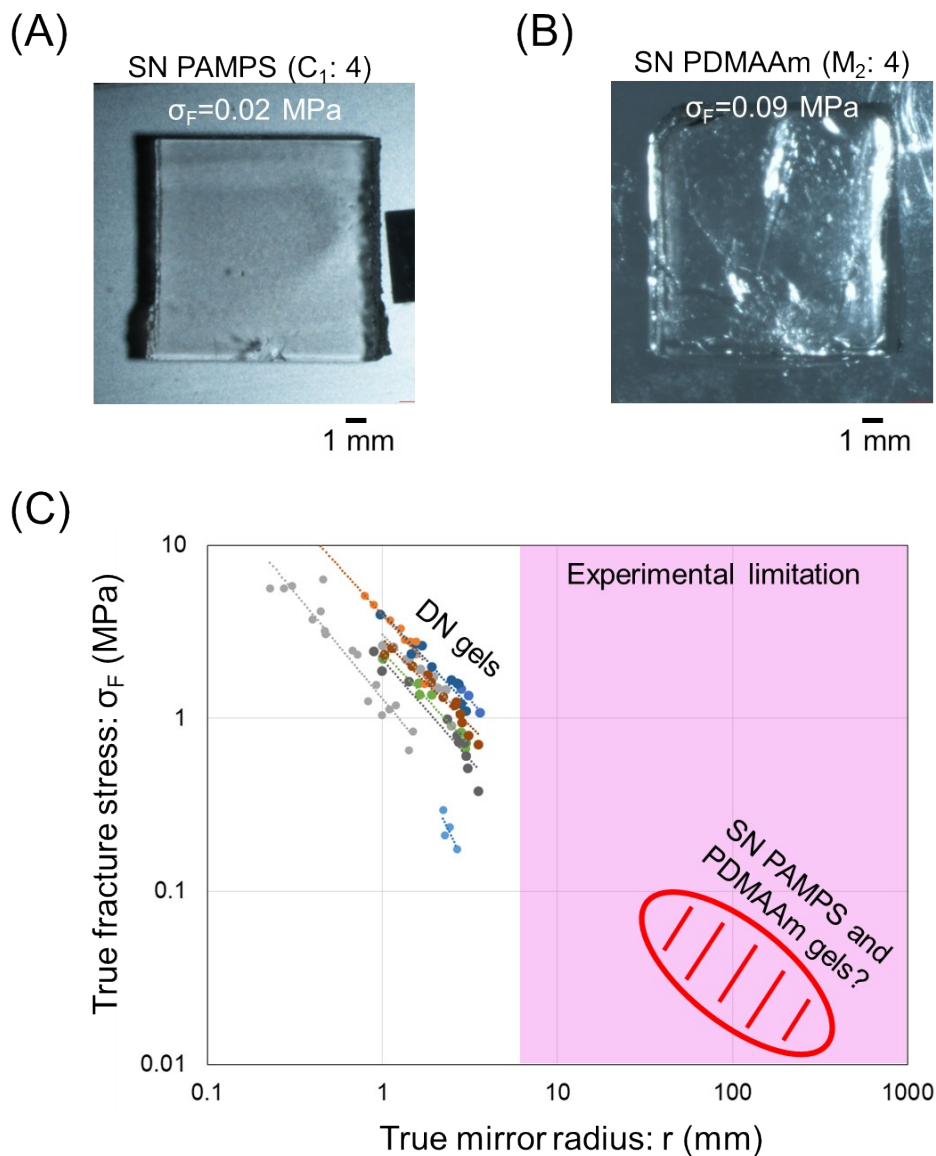

**Fig. S2.**

Fracture surfaces of single network (SN) gels, which are constituent materials of DN gels. (A) Equilibrium swollen SN PAMPS gels ( $C_1:4$ ). (B) Non-swollen SN PDMAAm gels ( $M_2:4$ ). (C) Relationship between fracture stress and mirror radius. These SN gels break with a smaller fracture stress (10–100 kPa) than DN gels (0.2–10 MPa). Therefore, the expected mirror radius (red-hatched region) greatly exceeds the sample size (1 cm  $\times$  1 cm) used in this study.

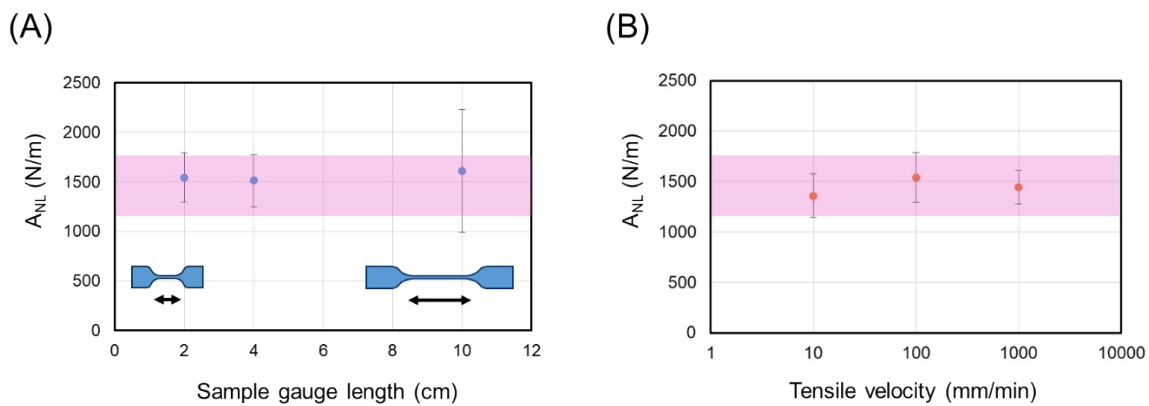

**Fig. S3.**

Material constant  $A_{NL}$  under different experimental conditions. (A) Different sample gauge lengths. (B) Different tensile velocities. The sample composition is DN gel (8/2).

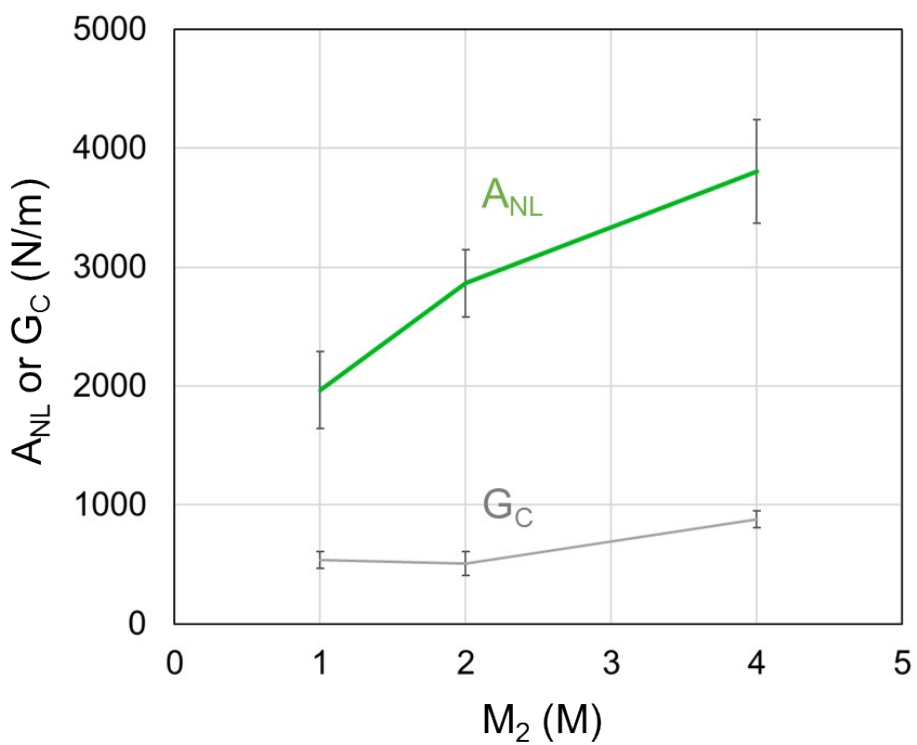

**Fig. S4.**

Relationship between mirror constant  $A_{NL}$  and critical energy release rate  $G_c$  of DN hydrogels with varied second-network monomer concentrations  $M_2$ . The  $G_c$  was measured using a pure shear test [27]. The sample composition is DN gel (4/  $M_2$ ).

**Movie S1.**

Tensile test movie of DN (8/2).
